# Supplementary material for: A Systematic Study and Potential Limitations of Proton-ELISA Platform for α-Synuclein Antigen Detection
Source: MDPI journal article supplement (doi:10.3390/chemosensors10010005), 2021-12-24
Supplement: s1 [file s1]

## **Supplementary Materials:**

### **A Systematic Study and Potential Limitations of Proton-ELISA**

#### **Platform for $\alpha$ -synuclein Antigen Detection**

**Chia-Ming Yang** <sup>1,2,3,4,5,6,7</sup>, **Jia-Yuan Chang** <sup>1</sup>, **Min-Yi Chen** <sup>1</sup> and **Chao-Sung Lai** <sup>1,3,6,7,8,\*</sup>

<sup>1</sup> Department of Electronic Engineering, Chang Gung University, Taoyuan 333, Taiwan

<sup>2</sup> Institute of Electro-Optical Engineering, Chang Gung University, Taoyuan 333, Taiwan

<sup>3</sup> Biosensor Group, Biomedical Engineering Research Center, Chang Gung University, Taoyuan 333, Taiwan

<sup>4</sup> Department of General Surgery, Chang Gung Memorial Hospital, Linkou, Taoyuan 333, Taiwan

<sup>5</sup> Department of Neurosurgery, Chang Gung Memorial Hospital, Linkou, Taoyuan 333, Taiwan

<sup>6</sup> Artificial Intelligence Research Center, Chang-Gung University, Taoyuan 333, Taiwan

<sup>7</sup> Department of Materials Engineering, Ming-Chi University of Technology, New Taipei City 243, Taiwan

<sup>8</sup> Department of Nephrology, Chang Gung Memorial Hospital, Linkou, Taoyuan 333, Taiwan

**\* Corresponding author: Prof. Chao-Sung Lai**

E-mail: cslai@mail.cgu.edu.tw

Tel: +886-3-2118800 (ext. 5786)

Fax: +886-3-2118507

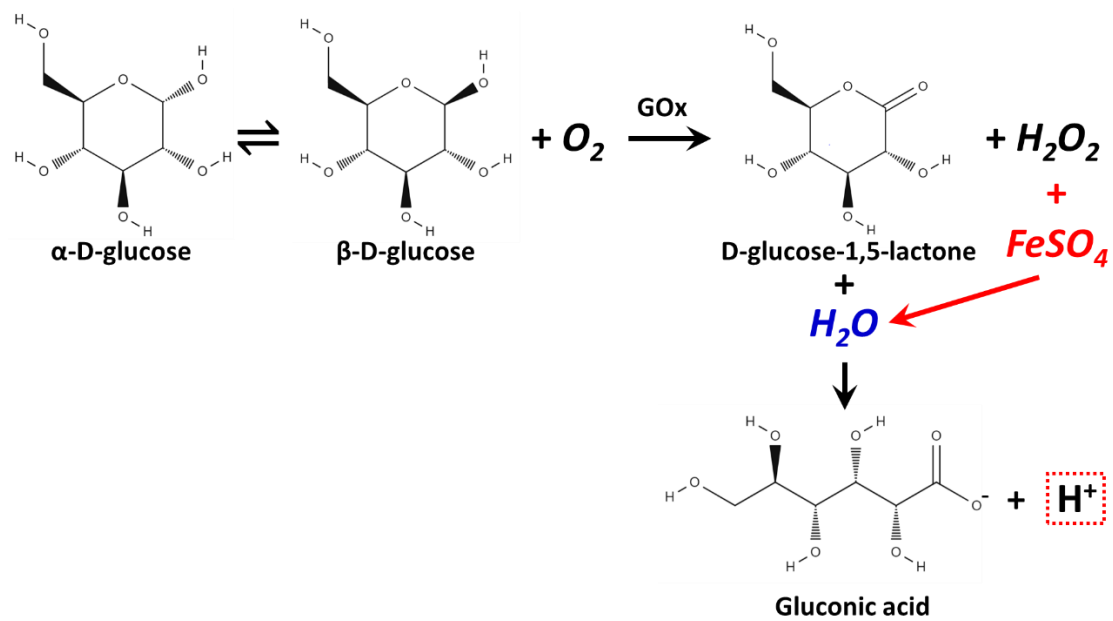

**Figure S1.** Schematic plot of the reaction of Proton-ELISA with GOx and FeSO<sub>4</sub> solution.

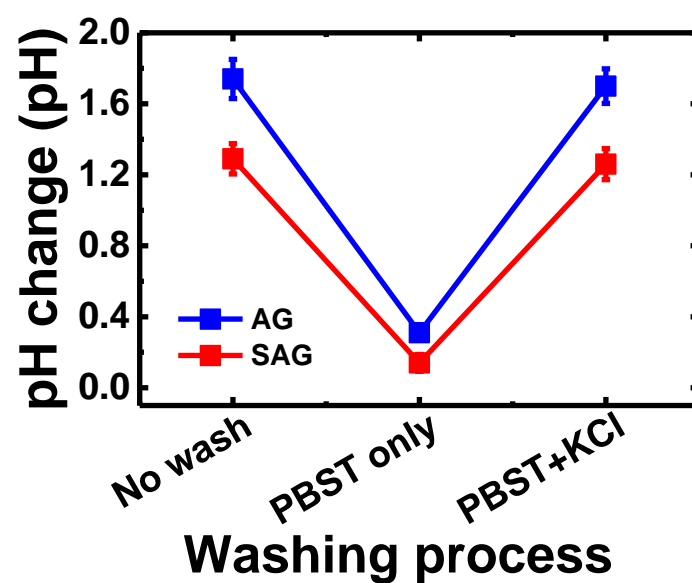

**Figure S2.** The pH change by different washing process including no wash, PBST only and PBST + KCl washing for Gox and G-sub reaction, which is followed the same protocol as Part #2. It can be clearly seen PBST + KCl washing had reduced the buffer residue and its function.
